# Supplementary material for: The atypical RhoGTPase RhoE/Rnd3 is a key molecule to acquire a neuroprotective phenotype in microglia
Source: J Neuroinflammation. 2018 Dec 15;15:343. doi: 10.1186/s12974-018-1386-z (PMC6295018; doi:10.1186/s12974-018-1386-z)
Supplement: Supplementary file 2 — Table S1. List of siRNA targets resulting in positive differential circularity. Primary microglia were transfected with a pool of siRNA oligonucleotides against each gene and tested for their effect on CM-induced microglia ramification. The result was expressed as differential circularity. siRNAs that caused positive differential circularity values were selected and sorted by their fold discovery rate (FDR), which represents an adjusted P value. Statistically significant genes were marked in bold. Genes that were annotated by the Parkinson’s UK Gene Ontology Project [22] are marked in the PD gene column. Genes that were listed in the PD map tool of the University of Luxembourg (http://pdmap.uni.lu/minerva/) are marked in the PD map column [23]. Genes overlapping with differential transcriptome expression data from post mortem tissue of the substantia nigra [24] published on the PD map webpage (http://pdmap.uni.lu/minerva/) are marked in the last column. *Positive hits that were selected for validation. (XLSX 55 kb) [file 12974_2018_1386_MOESM2_ESM.xlsx]

## Sheet: Differential_expression_siRNAs_
gene	gene	differential	P.Value	FDR	other	PD	PD	PD
symbol	ID	circularity			names	genes	map	Substantia Nigra
Arhgef4*	226970	3.02378	<10-47	<10-45	Asef			x
Rnd3*	74194	2.76967	<10-40	<10-38	RhoE
Tiam1*	21844	2.51644	<10-34	<10-32		x
Mapk11*	19094	2.084	<10-24	<10-22	p38b
Csf2ra*	12982	1.91267	<10-20	<10-19	GM-CSFR
Map3k2*	26405	1.727	<10-17	<10-15
Map2k3*	26397	1.59178	<10-14	<10-13	MEK3		x
Rasgrf2	19418	1.57144	<10-14	<10-13
Cdc42	12540	1.54522	<10-13	<10-12				x
Rhoh	74734	1.43211	<10-12	<10-11
Arhgef26	622434	1.34989	<10-10	<10-9
Creb1*	12912	1.33889	<10-10	<10-9			x
Arhgef3	71704	1.297	<10-10	<10-9
Arhgef9	236915	1.23622	<10-9	<10-8				x
Rac1	19353	1.17344	<10-8	<10-7			x	x
Rhoj	80837	1.13811	<10-8	<10-7
Prex2	109294	1.10922	<10-7	<10-6
Mapk9*	26420	1.03711	<10-6	<10-6	JNK2		x	x
Map2k7	26400	0.952556	<10-5	<10-5	MEK7		x	x
Ptk2	14083	0.922111	<10-5	<0.0001
Akt1	11651	0.907111	<10-5	<0.0001			x
Mapk12	29857	0.868444	<0.0001	<0.0001	p38g	x	x
Nfkbia*	18035	0.852778	<0.0001	<0.0001	IkBa		x	x
Rnd2	11858	0.826667	<0.0001	<0.001				x
Arhgef25	52666	0.806444	<0.0001	<0.001
Chuk	12675	0.784111	<0.0001	<0.001	IKK1		x
Dock6	319899	0.760667	<0.001	<0.001				x
Vav1	22324	0.746556	<0.001	<0.001
Mapk3	26417	0.731444	<0.001	<0.001
Arhgef18	102098	0.694444	<0.001	<0.01				x
Farp2	227377	0.675778	<0.001	<0.01
Arhgef2	16800	0.640222	<0.01	<0.01				x
Plekhg4	102075	0.605	<0.01	<0.01
Map3k1	26401	0.589333	<0.01	<0.01
Pdk1	228026	0.586	<0.01	<0.01			x
Pparg	19016	0.577111	<0.01	<0.01			x
Ect2l	100045792	0.553111	<0.01	<0.01
Rac2	19354	0.534444	<0.05	<0.05
Bcr	110279	0.522	<0.05	<0.05				x
Abr	109934	0.517444	<0.05	<0.05
Arhgef7	54126	0.503889	<0.05	<0.05				x
Rhoc	11853	0.493778	<0.05	<0.05				x
Plekhg2	101497	0.460333	<0.05	<0.05
Map2k5	23938	0.444111	<0.05	<0.05
Ect2	13605	0.412	<0.05	0.0593253				x
Plekhg1	213783	0.394333	0.0455447	0.0714427
Mapk8ip2	60597	0.374	0.0578739	0.0881887
Plekhg3	263406	0.363889	0.0649714	0.0971534
Obscn	380698	0.342	0.0828117	0.120453
Arhgef10	234094	0.317667	0.107108	0.151657
Rac3	170758	0.304333	0.122643	0.170485
Ngef	53972	0.289778	0.141559	0.193585
Mapk13	26415	0.280444	0.154821	0.208163
Csf3r	12986	0.273333	0.165544	0.218902
Map4k1	26411	0.234444	0.234239	0.297447
Arhgef15	442801	0.228778	0.245733	0.307167
Dnmbp	71972	0.216111	0.272841	0.338408
Rhog	56212	0.201444	0.306705	0.377483
Fgd5	232237	0.196	0.319957	0.388492
Als2	74018	0.19	0.334989	0.402994
Itsn2	20403	0.174	0.37726	0.448569
Rhobtb2	246710	0.163444	0.406873	0.47693
Map2k2	26396	0.154222	0.433849	0.499394
Pak1	18479	0.151111	0.443177	0.506488
Irf1	16362	0.130556	0.50762	0.571966
Rhob	11852	0.118667	0.547025	0.607805
Mapk6	50772	0.107778	0.584398	0.644853
Nfkb1	18033	0.085	0.666188	0.725102
Arhgef1	16801	0.0773333	0.694704	0.745991
Mcf2	109904	0.0595556	0.762455	0.802584
Rhoa	11848	0.0554444	0.778408	0.814021
Rhobtb3	73296	0.0391111	0.842654	0.86426
Spata13	219140	0.0255556	0.896802	0.913938
Pdk2	18604	0.0164444	0.933485	0.939356
Pik3cg	30955	0.00377778	0.984703	0.984703
Additional file 2, table S1: List of siRNA targets resulting in positive differential circularity.
Primary microglia were transfected with a pool of siRNA oligonucleotides against each gene and tested for their effect on CM-induced microglia ramification. The result was expressed as differential circularity. siRNAs that caused positive differential circularity values were selected and sorted by their fold discovery rate (FDR), which represents an adjusted P-value. Statistically significant gen…
