# Supplementary material for: The atypical RhoGTPase RhoE/Rnd3 is a key molecule to acquire a neuroprotective phenotype in microglia
Source: J Neuroinflammation. 2018 Dec 15;15:343. doi: 10.1186/s12974-018-1386-z (PMC6295018; doi:10.1186/s12974-018-1386-z)
Supplement: Supplementary file 3 — Table S2. List of siRNA targets resulting in negative differential circularity. Primary microglia were transfected with a pool of siRNA oligonucleotides against each gene and tested for their effect on CM-induced microglia ramification, which was expressed as differential circularity. siRNAs that resulted in negative differential circularity values were selected and sorted by their fold discovery rate (FDR). Statistically significant genes were marked in bold. Genes that were annotated by the Parkinson’s UK Gene Ontology Project [22] are marked in the PD genes column. Genes that were listed in the PD map tool of the University of Luxembourg (http://pdmap.uni.lu/minerva/) are marked in the PD map column [23]. Genes overlapping with differential transcriptome expression data from post mortem tissue of the substantia nigra [24] published on the PD map webpage (http://pdmap.uni.lu/minerva/) are marked in the last column. (XLSX 56 kb) [file 12974_2018_1386_MOESM3_ESM.xlsx]

## Sheet: Differential_expression_siRNAs_
gene	gene	differential	P.Value	FDR	other	PD	PD	PD
symbol	ID	circularity			names	genes	map	Substantia Nigra
Nfkbib	18036	-1.992	<10-22	<10-20	IkBb
Mapk10	26414	-1.73567	<10-17	<10-15	JNK	x	x	x
Tiam2	24001	-1.45667	<10-12	<10-11
Dock1	330662	-1.38689	<10-11	<10-10				x
Mapk1	26413	-1.32289	<10-10	<10-9	ERK1/2		x	x
Pik3ca	18706	-1.26644	<10-9	<10-8
Nfkb2	18034	-1.23344	<10-9	<10-8
Vav2	22325	-1.20333	<10-8	<10-8
Net1	56349	-1.17211	<10-8	<10-7
Akt2	11652	-1.13544	<10-7	<10-7			x
Rhof	23912	-1.10067	<10-7	<10-6
Arhgef16	230972	-1.05722	<10-7	<10-6				x
Crebbp	12914	-1.02378	<10-6	<10-5			x	x
Mapkapk3	102626	-1.008	<10-6	<10-5
Rnd1	223881	-0.990111	<10-6	<10-5				x
Dock7	67299	-0.946222	<10-5	<10-5
Mapkapk2	17164	-0.919333	<10-5	<0.0001				x
Arhgef11	213498	-0.899333	<10-5	<0.0001
Gsk3b	56637	-0.869444	<0.0001	<0.0001		x	x
Pik3r2	18709	-0.860778	<0.0001	<0.0001		x		x
Fgd1	14163	-0.843889	<0.0001	<0.0001
Map2k4	26398	-0.795889	<0.0001	<0.001			x
Csf1r	12978	-0.784667	<0.0001	<0.001
Rhov	228543	-0.771778	<0.0001	<0.001
Dock3	208869	-0.767444	<0.001	<0.001				x
Dock5	68813	-0.752556	<0.001	<0.001
Csf1	12977	-0.744111	<0.001	<0.001				x
Trio	223435	-0.740111	<0.001	<0.001
Prkd1	18760	-0.709111	<0.001	<0.001
Mapk14	26416	-0.691	<0.001	<0.01
Rel	19696	-0.682778	<0.001	<0.01
Mapk8	26419	-0.676778	<0.001	<0.01
Stat1	20846	-0.668889	<0.001	<0.01
Dock2	94176	-0.662111	<0.001	<0.01
Rhod	11854	-0.652556	<0.001	<0.01
Pik3r1	18708	-0.644667	<0.01	<0.01		x
Rhot2	214952	-0.638889	<0.01	<0.01
Dock9	105445	-0.626	<0.01	<0.01
Prkd2	101540	-0.61	<0.01	<0.01
Nfkbie	18037	-0.597778	<0.01	<0.01
Arhgef19	213649	-0.583111	<0.01	<0.01
Prex1	277360	-0.570444	<0.01	<0.01
Arhgef5	54324	-0.558444	<0.01	<0.01
Ikbkg	16151	-0.538778	<0.01	<0.05
Farp1	223254	-0.51	<0.01	<0.05
Arhgef12	69632	-0.497333	<0.05	<0.05
Dock8	76088	-0.479444	<0.05	<0.05
Arhgef10l	72754	-0.463222	<0.05	<0.05
Mapk7	23939	-0.443556	<0.05	<0.05
Prkca	18750	-0.433444	<0.05	<0.05
Rela	19697	-0.407333	<0.05	0.0622184
Sos2	20663	-0.397556	<0.05	0.0694029
Prkcb	18751	-0.384333	0.0512993	0.0796882
Arhgef17	207212	-0.379222	0.0544685	0.0837977
Map3k3	26406	-0.372889	0.0586208	0.0884842
Ikbkb	16150	-0.358	0.0694265	0.102854
Rhot1	59040	-0.351667	0.0744952	0.109351
Mtor	56717	-0.335889	0.0884474	0.127492
Itsn1	16443	-0.322889	0.101466	0.144951
Kalrn	545156	-0.316333	0.108587	0.152403
Pten	19211	-0.303556	0.123601	0.170485
Sos1	20662	-0.288333	0.143552	0.194647
Jun	16476	-0.274111	0.164345	0.218902
Akt3	23797	-0.267556	0.174662	0.229064
Vav3	57257	-0.257556	0.19132	0.248872
Dock4	238130	-0.245556	0.212821	0.274608
Fgd3	30938	-0.235778	0.231591	0.296437
Rhobtb1	69288	-0.231111	0.240953	0.303563
Map2k6	26399	-0.195778	0.320506	0.388492
Fgd2	26382	-0.173556	0.37848	0.448569
Fgd4	224014	-0.162667	0.409109	0.47693
Akap13	75547	-0.161889	0.411352	0.47693
Csf2rb	12983	-0.147	0.455678	0.517082
Dock10	210293	-0.122667	0.533599	0.597034
Map3k4	26407	-0.0957778	0.626911	0.687026
Map2k1	26395	-0.0794444	0.686806	0.742493
Rasgrf1	19417	-0.074	0.707242	0.754391
Rhou	69581	-0.0675556	0.731705	0.775317
Mcf2l	17207	-0.0512222	0.79489	0.82586
Arhgef28	110596	-0.0453333	0.81803	0.844418
Plekhg6	213522	-0.0212222	0.914226	0.925798
Additional file 3, table S2: List of siRNA targets resulting in negative differential circularity. Primary microglia were transfected with a pool of siRNA oligonucleotides against each gene and tested for their effect on CM-induced microglia ramification, which was expressed as differential circularity. siRNAs that resulted in negative differential circularity values were selected and sorted by t…
